# Supplementary material
Source: PubMed Central journal article supplement (PMC2174875)
Supplement: plntcell_tpc.107.054882_1.pdf [file plntcell_tpc.107.054882_1.pdf]

Supplemental Data. Uniacke and Zerges. (2007). Photosystem II Assembly and Repair are Differentially Localized in Chlamydomonas.

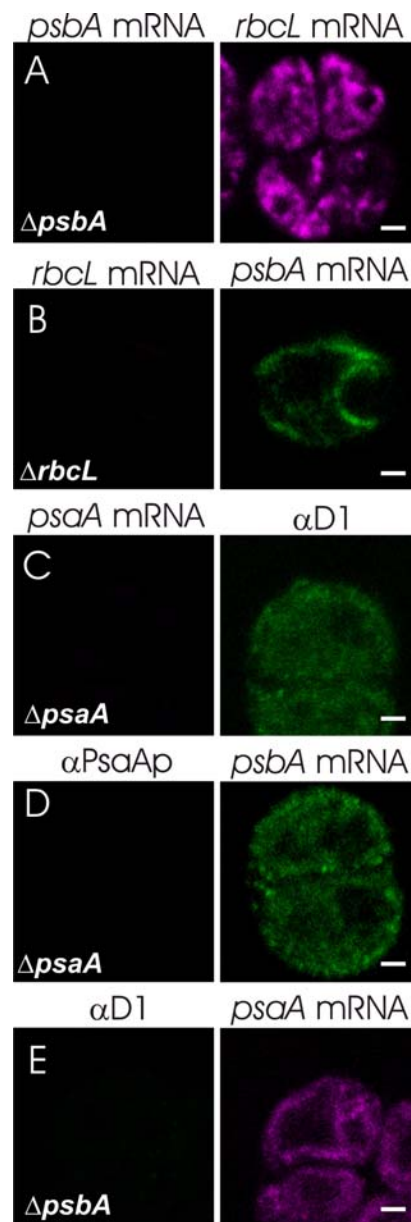

**Supplemental Figure 1. Control experiments revealed high specificities of FISH and IF signals.** Deletion mutants for the corresponding chloroplast gene lacked the fluorescence signals from the FISH probes against the mRNAs of (A) *psbA*, (B) *rbcL*, (C) *psaA*, and the IF signals from (D) PsaA and (E) D1. The right-hand images show the signal of other mRNAs or proteins as positive controls. Each image shows a 0.2  $\mu\text{m}$  optical section. Bars = 1.0  $\mu\text{m}$ .

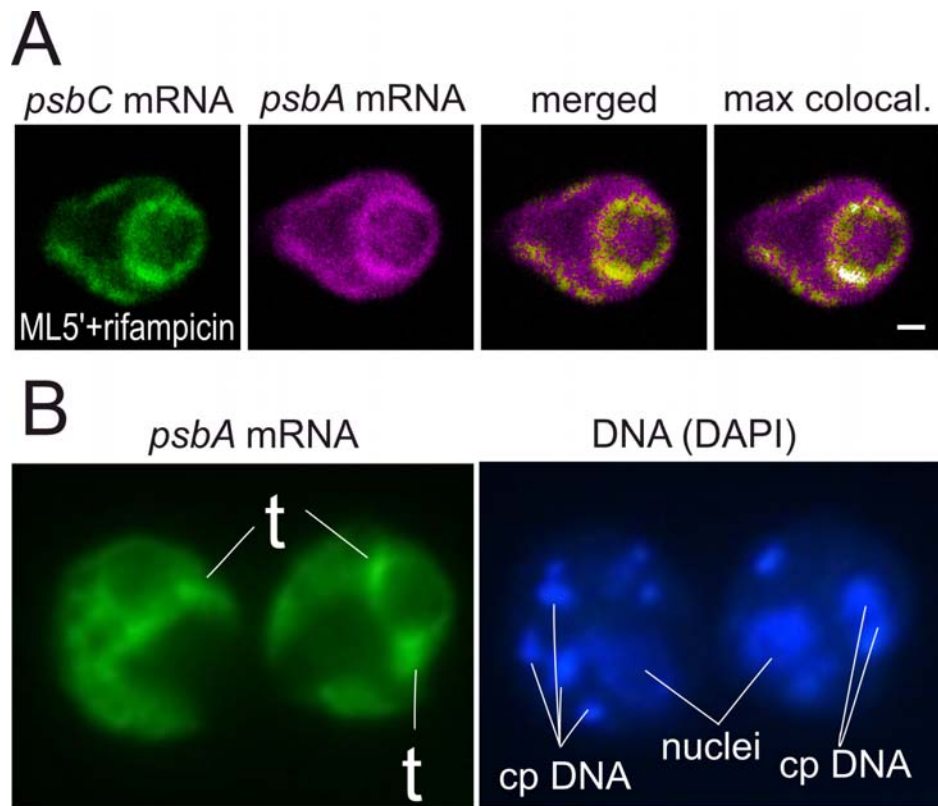

**Supplemental Figure 2. *psbA* transcription does not generate the localized *psbA* mRNAs in t-zones.**

**(A)** In the presence of rifampicin, an inhibitor of the chloroplast RNA-polymerase, the *psbC* and *psbA* mRNAs colocalized in t-zones (90%, n= 20).

**(B)** Epifluorescence microscopy images show ML5' cells that were FISH-probed for the *psbA* mRNA and concurrently stained with DAPI to reveal of chloroplast nucleoids (cpDNA). In the right-hand image the *psbA* FISH signal in t-zones are indicated with "t". Nuclei are indicated. The upper t-zone of the right-hand cell does not stain with DAPI. Other chloroplast nuclei do not have strong *psbA* FISH signal.
